# Supplementary material for: Geospatial Analysis of Out-of-Hospital Cardiac Arrest Incidence
Source: Research Square preprint supplement (doi:10.21203/rs.3.rs-7736852/v1), 2025-11-13
Supplement: Supplementary file 1 [file 745cb372f0f4e0982f351d47.docx]

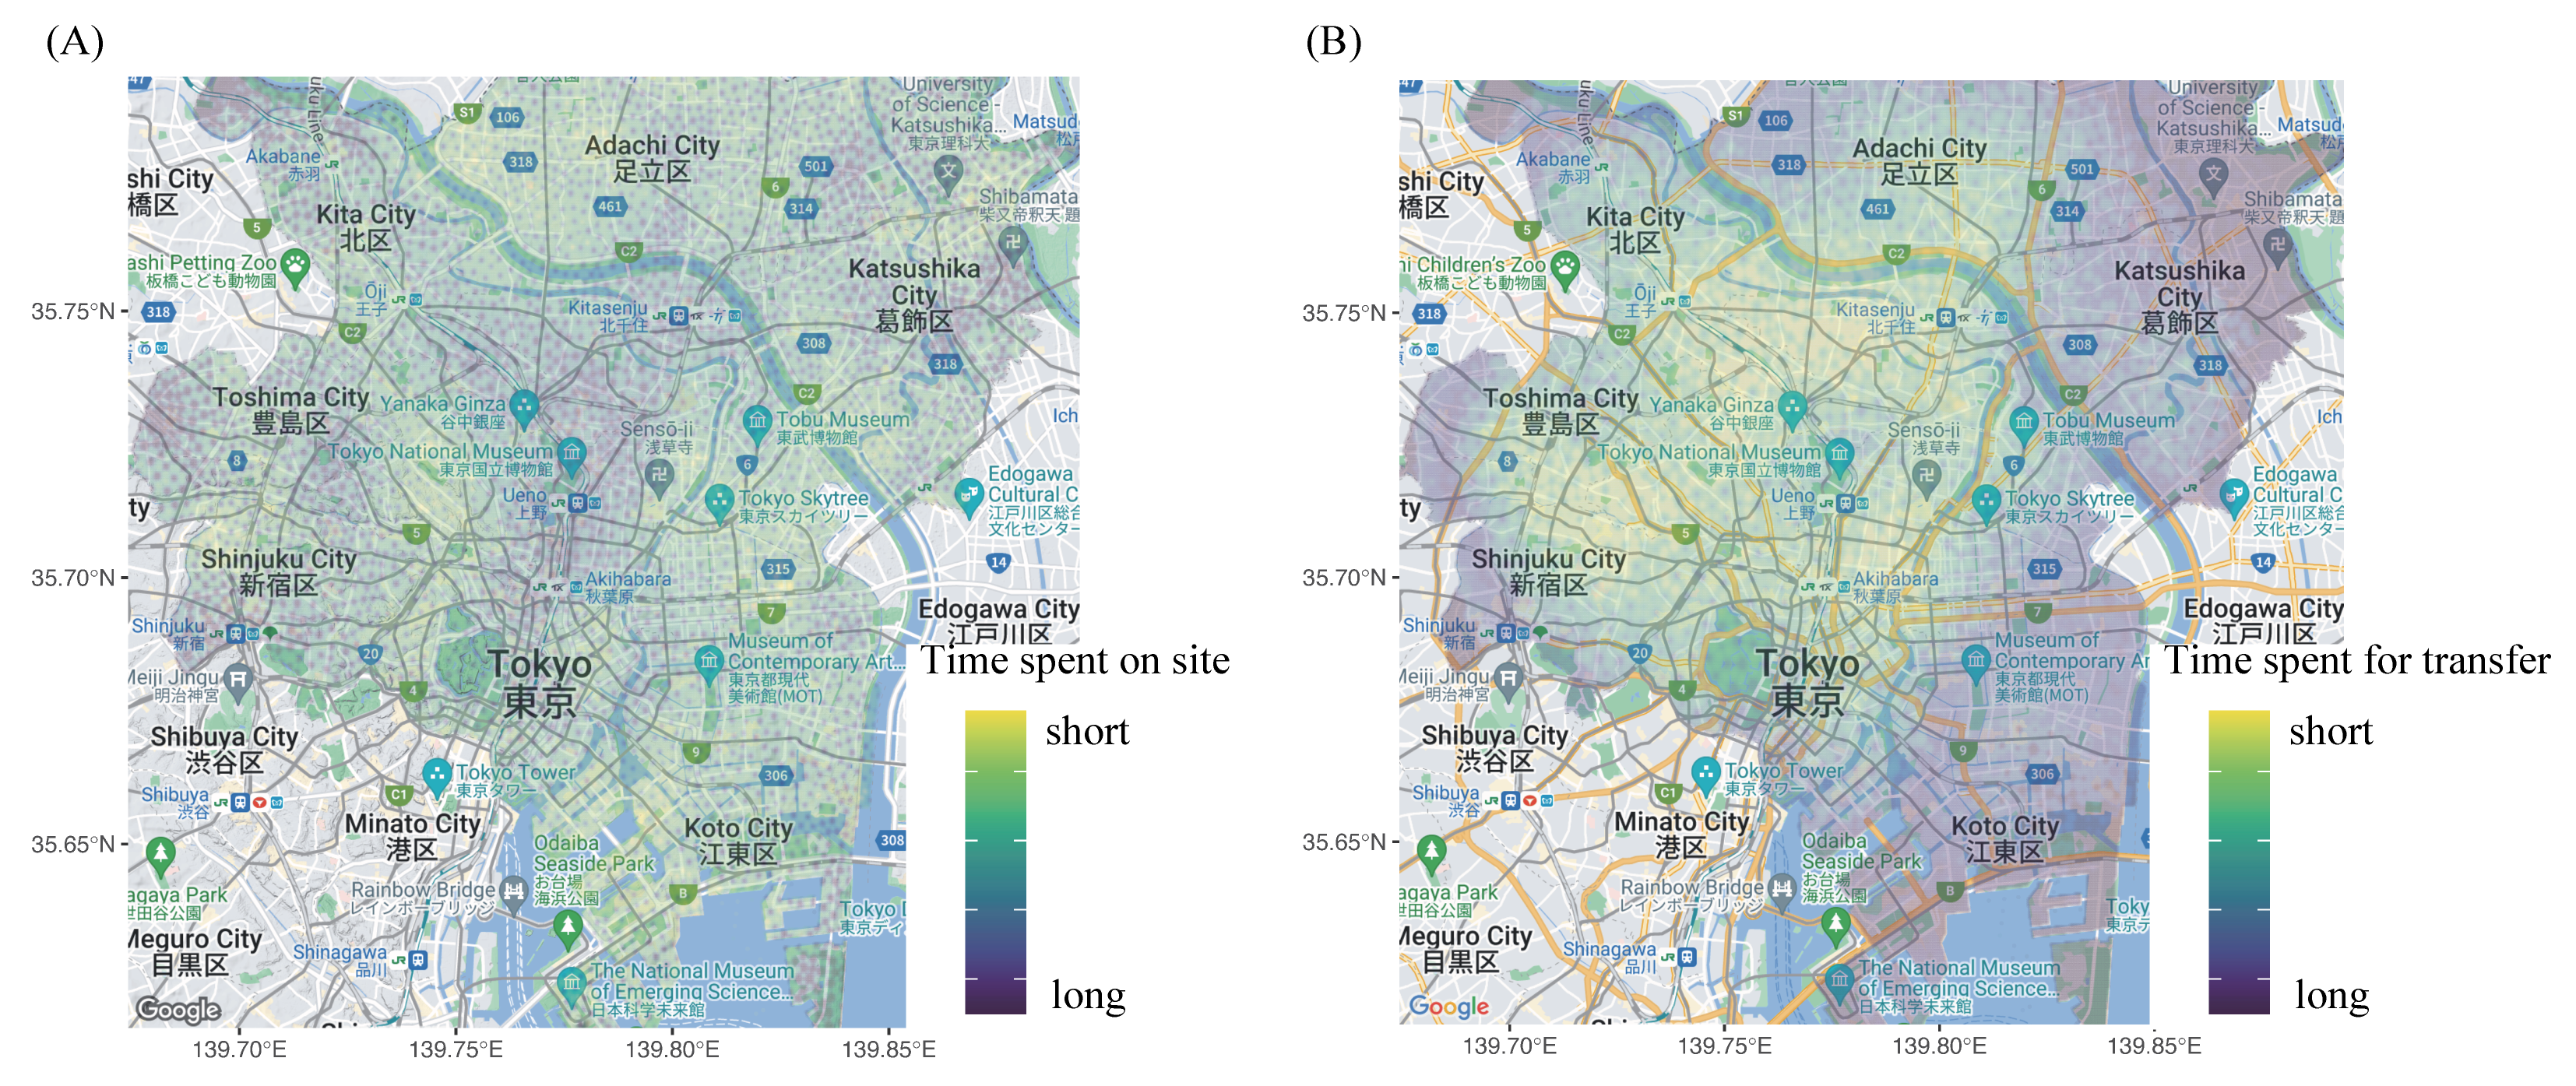


Additional file 2: The original Figure 2 without annotations.

The map information in this figure is based on Google Maps, and its use complies with the License Agreements (https://cloud.google.com/maps-platform/terms/).
