# Supplementary material for: Geospatial Analysis of Out-of-Hospital Cardiac Arrest Incidence
Source: Research Square preprint supplement (doi:10.21203/rs.3.rs-7736852/v1), 2025-11-13
Supplement: Supplementary file 2 [file 80e20b6f9b40a33086c69600.docx]

Additional file 1: The original Figure 1 without annotations.

The map information in this figure is based on Google Maps, and its use complies with the License Agreements (https://cloud.google.com/mapsplatform/terms/).
